# Supplementary material
Source: PubMed Central journal article supplement (PMC9066282)
Supplement: jama-e224726-s003.pdf [file jama-e224726-s003.pdf]

## Supplemental Online Content

Chappell LC, Tucker KL, Galal U, et al; BUMP2 Investigators. Effect of self-monitoring of blood pressure on blood pressure control in pregnant individuals with chronic or gestational hypertension. *JAMA*. doi:10.1001/jama.2022.4726

**eFigure.** Chart for Interpreting Blood Pressure Reading BUMP2

**eTable 1.** Secondary Outcomes

**eTable 2.** Recruitment by Site

**eTable 3.** Planned Sensitivity Analyses

**eTable 4.** Secondary Outcomes (Descriptive) for Women With Chronic and Gestational Hypertension

**eTable 5.** STAI and MARS Questionnaire Measures for Women With Chronic and Gestational Hypertension

**eTable 6.** Adapted Brief Illness Perception Questionnaire – Chronic Hypertension and Gestational Hypertension

**eTable 7.** Summary of maternal health-related quality of life measured using EQ-5D-5L instrument in the chronic hypertension cohort and in the gestational hypertension cohort

**eTable 8.** Adverse Events and Serious Adverse Events for Women With Chronic and Gestational Hypertension

**eTable 9.** Fidelity to Intervention: Proportion of Completed Home Blood Pressure Measurements (Out of the Number of Days With Expected Readings) for Self-monitoring Group Only

**eTable 10.** Defined Daily Dose (DDD) Proportions for Antihypertensive Medications Prescribed to Women Between Trial Entry and End of Pregnancy

This supplemental material has been provided by the authors to give readers additional information about their work.

| <b>LEVEL</b>  | <b>BLOOD PRESSURE<br/>/mmHg</b>          | <b>ACTION</b>                                                                                                                                                                                                                                                                                                                         |
|---------------|------------------------------------------|---------------------------------------------------------------------------------------------------------------------------------------------------------------------------------------------------------------------------------------------------------------------------------------------------------------------------------------|
| <b>HIGH</b>   | SYS 150 or more<br>OR<br>DIA 100 or more | Your blood pressure is high<br>Sit quietly for 5 minutes then measure it again and send in the reading.<br>Contact your maternity unit for urgent assessment today (within 4 hours) and continue to monitor your BP daily.                                                                                                            |
| <b>RAISED</b> | SYS 140-149<br>OR<br>DIA 90-99           | Your blood pressure is raised<br>Sit quietly for 5 minutes then measure it again and send in the reading.<br>If your repeated reading is raised please contact your maternity unit within 24 hours and continue to monitor your BP daily.                                                                                             |
| <b>NORMAL</b> | SYS 110-139<br>OR<br>DIA 70-89           | Your blood pressure is normal.<br>Continue blood pressure monitoring and your current care                                                                                                                                                                                                                                            |
| <b>LOW</b>    | SYS 109 or less<br>AND<br>DIA 69 or less | Your blood pressure is low. Repeat once more in 5 minutes.<br>If you are taking blood pressure medication, contact your maternity unit within 24 hours or within 4 hours if you feel unwell (e.g. dizzy or faint).<br>If you are not taking medication and you are feeling well this blood pressure does not need any further action. |

**eFigure.** Chart for interpreting blood pressure reading BUMP2

SYS – systolic, DIA – diastolic

You should seek immediate medical help if you experience any symptoms of pre-eclampsia, which include: severe headache, problems with vision, such as blurred vision or lights flashing before the eyes, severe pain just below the ribs, vomiting, sudden swelling of the face, hands or feet - regardless of your blood pressure readings. If at any time you are concerned about your, or your baby's, health you should contact your community midwife or seek other medical advice.

**eTable 1.** Secondary Outcomes

|                                                                                                                                                                        |
|------------------------------------------------------------------------------------------------------------------------------------------------------------------------|
| <b>Maternal</b>                                                                                                                                                        |
| • Difference in mean diastolic BP between usual care and self-monitoring groups.                                                                                       |
| • Difference in the mean area under the BP over time curve between usual care and self-monitoring group.                                                               |
| • Difference in the mean proportion of readings above 140mmHg (BP load) between usual care and self-monitoring group.                                                  |
| • Severe hypertension (systolic BP $\geq$ 160 or diastolic BP $\geq$ 110mmHg)                                                                                          |
| • Serious maternal complications (pre-eclampsia, placental abruption, transient ischemic attack or stroke, pulmonary oedema, renal failure, blood transfusion), death. |
| • Onset of labour                                                                                                                                                      |
| • Quality of life: EQ-5D-5L                                                                                                                                            |
| <b>Perinatal</b>                                                                                                                                                       |
| • Gestation at delivery                                                                                                                                                |
| • Birth weight including centile                                                                                                                                       |
| • Small for gestational age infants (<10th and <3 <sup>rd</sup> centile)                                                                                               |
| • Neonatal admissions including length of stay                                                                                                                         |
| • Stillbirth                                                                                                                                                           |
| • Early neonatal deaths • Mode of delivery                                                                                                                             |
| <b>Process</b>                                                                                                                                                         |
| • Health Behaviours (Illness perception Questionnaire)                                                                                                                 |
| • Fidelity to monitoring schedule                                                                                                                                      |
| • Adherence to medication: MARS questionnaire                                                                                                                          |
| • STAI-6 short form anxiety questionnaire                                                                                                                              |
| • Health service costs: outpatient consultations (primary & secondary care), inpatient stays, type and dose of antihypertensive medication. <sup>a</sup>               |
| • Cost per quality-adjusted life year gained over trial period. <sup>a</sup>                                                                                           |

<sup>a</sup>To be reported separately

**eTable 2.** Recruitment by Site

| Site                          | Chronic hypertension |            |       | Gestational hypertension |            |       |
|-------------------------------|----------------------|------------|-------|--------------------------|------------|-------|
|                               | Self-Monitoring      | Usual Care | Total | Self-Monitoring          | Usual Care | Total |
|                               | n=233                | n=221      | n=454 | n=197                    | n=199      | n=396 |
| Oxford University Hospitals   | 15                   | 15         | 30    | 36                       | 39         | 75    |
| Guy's and St Thomas' Hospital | 47                   | 44         | 91    | 20                       | 22         | 42    |
| Bart's Health                 | 3                    | 1          | 4     | 8                        | 9          | 17    |
| Wolverhampton                 | 19                   | 20         | 39    | 12                       | 13         | 25    |
| Royal Berkshire               | 10                   | 9          | 19    | 11                       | 11         | 22    |
| Chelsea and Westminster       | 11                   | 13         | 24    | 5                        | 7          | 12    |
| Manchester                    | 40                   | 40         | 80    | 15                       | 16         | 31    |
| Whipps Cross                  | 4                    | 9          | 13    | 7                        | 5          | 12    |
| King's College Hospital       | 14                   | 11         | 25    | 9                        | 7          | 16    |
| West Middlesex                | 24                   | 20         | 44    | 12                       | 12         | 24    |
| Kingston                      | 7                    | 2          | 9     | 10                       | 13         | 23    |
| St George's                   | 22                   | 23         | 45    | 7                        | 3          | 10    |
| Birmingham Women's            | 14                   | 9          | 23    | 23                       | 14         | 37    |
| Croydon University Hospital   | 3                    | 5          | 8     | 8                        | 16         | 24    |
| Stoke Mandeville Hospital     | 233                  | 221        | 454   | 197                      | 199        | 396   |

**eTable 3.** Planned Sensitivity Analyses

|                                                                                     | Self-Monitoring | Usual Care   | Adjusted mean difference for Self-Monitoring vs. Usual Care (95% CI) | p value           |
|-------------------------------------------------------------------------------------|-----------------|--------------|----------------------------------------------------------------------|-------------------|
| <b>Chronic hypertension</b>                                                         | <b>n=233</b>    | <b>n=221</b> |                                                                      |                   |
| <b>Clinic-measured systolic blood pressure readings only</b>                        |                 |              |                                                                      |                   |
| Mean (SD) systolic blood pressure                                                   | 131.9 (9.2)     | 131.5 (9.7)  | 0.47 (-1.06 to 1.99) <sup>a</sup>                                    | 0.55              |
| <b>Highest systolic clinic blood pressure measurement</b>                           |                 |              |                                                                      |                   |
| Mean (SD) systolic blood pressure                                                   | 151.4 (15.5)    | 151.6 (15.6) | 0.19 (-2.52 to 2.90) <sup>a</sup>                                    | 0.89              |
|                                                                                     |                 |              |                                                                      |                   |
| <b>Gestational hypertension</b>                                                     | <b>n=197</b>    | <b>n=199</b> |                                                                      |                   |
| <b>Clinic-measured systolic blood pressure readings only</b>                        |                 |              |                                                                      |                   |
| Mean (SD) systolic blood pressure                                                   | 133.4 (10.1)    | 133.8 (9.5)  | -0.88 (-2.91 to 1.15) <sup>b</sup>                                   | 0.39              |
| <b>Highest systolic clinic blood pressure measurement</b>                           |                 |              |                                                                      |                   |
| Mean (SD) systolic blood pressure                                                   | 147.1 (15.9)    | 148.3 (14.2) | -1.43 (-4.59 to 1.73) <sup>b</sup>                                   | 0.38              |
| <b>Adjusted for baseline covariates that predict missingness of primary outcome</b> |                 |              |                                                                      |                   |
| Mean (SD) systolic blood pressure                                                   | 137.6 (12.1)    | 137.2 (10.8) | -0.02 (-2.29 to 2.24) <sup>c</sup>                                   | 0.98              |
|                                                                                     |                 |              |                                                                      |                   |
| <b>Test for interaction between cohorts</b>                                         |                 |              |                                                                      |                   |
| Chronic hypertension                                                                |                 |              | 0.07 (-1.87 to 2.00)                                                 | 0.87 <sup>e</sup> |
| Gestational hypertension                                                            |                 |              | -0.18 (-2.28 to 1.92)                                                |                   |
|                                                                                     |                 |              |                                                                      |                   |
| <b>Combined cohorts (chronic and gestational hypertension)</b>                      | <b>n=430</b>    | <b>N=420</b> |                                                                      |                   |
|                                                                                     | 135.5 (11.3)    | 135.3 (11.1) | -0.13 (-1.57 to 1.30) <sup>d</sup>                                   | 0.86              |

<sup>a</sup> Estimated from linear mixed effects model adjusting for mean baseline systolic blood pressure, parity and recruitment site. N=10 participants not included in the model due to missing baseline systolic blood pressure.

<sup>b</sup> Estimated from linear mixed effects model adjusting for mean baseline systolic blood pressure, parity, transfer from BUMP1 and recruitment site. N=6 participants not included in the model due to missing baseline systolic blood pressure.

<sup>c</sup> Estimated from linear mixed effects model adjusting for mean baseline systolic blood pressure, parity, gestational weeks at entry, transition from BUMP1 and recruitment site. N=6 participants not included in the model due to missing baseline systolic blood pressure.

<sup>d</sup> Estimated from linear mixed effects model adjusting for mean baseline systolic blood pressure, parity and recruitment site. N=17 participants not included in the model due to missing baseline systolic blood pressure.

<sup>e</sup> Linear mixed-effects model of mean SBP modelled against an interaction between randomised group and subgroup indicator, parity site, and transition from BUMP1.

**eTable 4.** Secondary Outcomes (Descriptive) for Women With Chronic and Gestational Hypertension

|                                                                                       | Chronic hypertension |                | Gestational hypertension |                |
|---------------------------------------------------------------------------------------|----------------------|----------------|--------------------------|----------------|
|                                                                                       | Self-Monitoring      | Usual Care     | Self-Monitoring          | Usual Care     |
|                                                                                       | n=233                | n=221          | n=197                    | n=199          |
| <b>Onset of labour</b>                                                                |                      |                |                          |                |
| Spontaneous                                                                           | 13 (5.6%)            | 21 (9.5%)      | 31 (15.7%)               | 44 (22.1%)     |
| Induction                                                                             | 108 (46.4%)          | 101 (45.7%)    | 95 (48.2%)               | 88 (44.2%)     |
| Stimulation of labour                                                                 | 2 (0.9%)             | 3 (1.4%)       | 3 (1.5%)                 | 1 (0.5%)       |
| Pre-labour Caesarean section                                                          | 105 (45.1%)          | 90 (40.7%)     | 68 (34.5%)               | 64 (32.2%)     |
| <i>Missing</i>                                                                        | 5                    | 5              | 0                        | 2              |
|                                                                                       |                      |                |                          |                |
| <b>Maternal outcomes for those with primary outcome only (n, % of women)</b>          | <b>n=229</b>         | <b>n=215</b>   | <b>n=187</b>             | <b>n=190</b>   |
| One or more serious maternal complication                                             | 10 (4%)              | 17 (8%)        | 22 (12%)                 | 25 (13%)       |
|                                                                                       |                      |                |                          |                |
| <b>Indication for induction of labour or pre-labour Caesarean section<sup>a</sup></b> | <b>n=215</b>         | <b>n=194</b>   | <b>n=166</b>             | <b>n=153</b>   |
| Hypertension-related complication                                                     | 144 (67.0%)          | 117 (60.3%)    | 105 (63.3%)              | 96 (62.7%)     |
| Other maternal medical complication                                                   | 27 (12.6%)           | 34 (17.5%)     | 22 (13.3%)               | 15 (9.8%)      |
| Fetal compromise (on scan or cardiotocography)                                        | 47 (21.9%)           | 47 (24.2%)     | 40 (24.1%)               | 37 (24.2%)     |
| Breech presentation                                                                   | 8 (3.7%)             | 5 (2.6%)       | 5 (3.0%)                 | 4 (2.6%)       |
| Twins                                                                                 |                      | 2 (1.0%)       | 4 (2.4%)                 | 3 (2.0%)       |
| Other fetal/placental complication                                                    | 13 (6.0%)            | 13 (6.7%)      | 10 (6.0%)                | 10 (6.5%)      |
| Previous Caesarean section                                                            | 21 (9.8%)            | 16 (8.2%)      | 8 (4.8%)                 | 12 (7.8%)      |
| Maternal requests                                                                     | 6 (2.8%)             | 1 (0.5%)       | 3 (1.8%)                 | 3 (2.0%)       |
| Reaching 37 weeks' gestation                                                          | 24 (11.2%)           | 18 (9.3%)      | 15 (9.0%)                | 15 (9.8%)      |
| Other/Missing                                                                         | 3 (1.4%)             | 2 (1.0%)       | 3 (1.8%)                 | 2 (1.3%)       |
|                                                                                       |                      |                |                          |                |
| <b>Mode of birth (all births from 24 weeks)</b>                                       | <b>(n=233)</b>       | <b>(n=221)</b> | <b>(n=209)</b>           | <b>(n=207)</b> |
| Spontaneous vaginal birth                                                             | 61 (26.2%)           | 71 (32.1%)     | 75 (38.1%)               | 89 (44.7%)     |
| Assisted vaginal birth                                                                | 18 (7.7%)            | 18 (8.1%)      | 17 (8.6%)                | 17 (8.5%)      |
| Emergency pre-labour caesarean section                                                | 61 (26.6%)           | 46 (20.8%)     | 34 (17.3%)               | 36 (18.1%)     |
| Emergency caesarean section in labour                                                 | 27 (11.6%)           | 27 (12.2%)     | 34 (17.3%)               | 24 (12.1%)     |
| Elective pre-labour caesarean section                                                 | 65 (27.9%)           | 58 (26.2%)     | 49 (24.9%)               | 40 (20.1%)     |
| <i>Missing</i>                                                                        | 1                    | 1              | 0                        | 1              |

<sup>a</sup>Women could have one or more of these.

**eTable 5.** STAI and MARS Questionnaire Measures for Women With Chronic and Gestational Hypertension

|                                 | Self-Monitoring |                     | Usual Care   |                     | Adjusted mean difference for Self-Monitoring vs. Usual Care (95% CI) | p value |
|---------------------------------|-----------------|---------------------|--------------|---------------------|----------------------------------------------------------------------|---------|
| <b>Chronic hypertension</b>     | <b>n=233</b>    |                     | <b>n=221</b> |                     |                                                                      |         |
| <b>STAI</b>                     | <b>n</b>        |                     | <b>n</b>     |                     |                                                                      |         |
| At enrolment                    | 222             | 26.5 (18.1)         | 216          | 24.7 (19.4)         | -                                                                    |         |
| At 30 weeks                     | 172             | 27.6 (19.9)         | 164          | 25.2 (20.9)         | MD 1.81 (-1.94 to 5.56)                                              | 0.34    |
| At postnatal follow-up          | 132             | 31.9 (17.3)         | 122          | 24.1 (20.6)         | MD -2.15 (-6.43 to 2.13)                                             | 0.33    |
| <b>MARS-5</b>                   | <b>n</b>        |                     | <b>n</b>     |                     |                                                                      |         |
| At enrolment                    | 152             | 23.1 (2.5)          | 143          | 23.3 (2.4)          | -                                                                    |         |
| At 30 weeks                     | 138             | 24.0 (22.0 to 25.0) | 127          | 24.0 (23.0 to 25.0) | MedD 0.00 (-0.43 to 0.43)                                            | >0.99   |
| At postnatal follow-up          | 116             | 23.0 (21.0 to 24.0) | 94           | 24.0 (23.0 to 25.0) | MedD -0.50 (-1.38 to 0.38)                                           | 0.26    |
| <b>Gestational hypertension</b> | <b>n=197</b>    |                     | <b>n=199</b> |                     |                                                                      |         |
| <b>STAI</b>                     | <b>n</b>        |                     | <b>n</b>     |                     |                                                                      |         |
| At enrolment                    | 193             | 29.0 (20.6)         | 197          | 26.4 (18.5)         | -                                                                    |         |
| At 30 weeks                     | 122             | 30.4 (21.7)         | 126          | 28.7 (18.9)         | MD 0.19 (-4.37 to 4.76)                                              | 0.93    |
| At postnatal follow-up          | 115             | 25.3 (22.4)         | 107          | 26.4 (20.5)         | MD -2.13 (-6.93 to 2.68)                                             | 0.39    |
| <b>MARS-5</b>                   | <b>n</b>        |                     | <b>n</b>     |                     |                                                                      |         |
| At enrolment                    | 31              | 23.4 (2.8)          | 31           | 24.1 (1.7)          | -                                                                    |         |
| At 30 weeks                     | 25              | 25.0 (22.0 to 25.0) | 41           | 25.0 (24.0 to 25.0) | MedD 0.00 (-1.45 to 1.45)                                            | >0.99   |
| At postnatal follow-up          | 76              | 24.0 (22.0 to 25.0) | 76           | 24.0 (22.0 to 25.0) | MedD 0.00 (-1.34 to 1.34)                                            | >0.99   |

Summary statistics are shown as mean (SD) or median (IQR). STAI: State-Trait Anxiety Inventory. MARS: Medication Adherence Rating Scale. MD: mean difference. MedD: median difference

**eTable 6a.** Adapted Brief Illness Perception Questionnaire – Chronic Hypertension

| CH                                                                                          | Self-Monitoring (N=233) |                   |                     | Usual Care (N=221) |                         |                         |
|---------------------------------------------------------------------------------------------|-------------------------|-------------------|---------------------|--------------------|-------------------------|-------------------------|
|                                                                                             | Baseline                | 30 week follow-up | Postnatal follow-up | Baseline           | 30 week follow-up       | Postnatal follow-up     |
| <b>1 How confident are you that you can use a blood pressure monitor correctly? (N)</b>     | 226                     | 176               | 136                 | 220                | 170                     | 123                     |
| Mean (SD)                                                                                   | 9.0 (2.0)               | 9.4 (1.3)         | 9.5 (1.2)           | 9.0 (1.8)          | 8.4 (2.3)               | 8.8 (2.2)               |
| <b>2 How confident are you that you can accurately measure your blood pressure at home?</b> | 227                     | 175               | 136                 | 220                | 170                     | 122                     |
| Mean (SD)                                                                                   | 9.0 (1.9)               | 9.4 (1.4)         | 9.5 (1.2)           | 8.9 (1.9)          | 8.4 (2.2)               | 8.6 (2.5)               |
| <b>3 How well do you feel you understand your blood pressure?</b>                           | 227                     | 176               | 136                 | 218                | 170                     | 123                     |
| Mean (SD)                                                                                   | 8.4 (2.2)               | 9.0 (1.5)         | 8.9 (1.5)           | 8.3 (2.2)          | 8.1 (2.3)               | 8.2 (2.1)               |
| <b>4 How much control do you feel you have over your blood pressure?</b>                    | 226                     | 175               | 135                 | 220                | 169                     | 124                     |
| Mean (SD)                                                                                   | 6.0 (2.7)               | 6.5 (2.5)         | 6.3 (2.5)           | 6.0 (2.6)          | 6.0 (2.7)               | 5.9 (2.5)               |
| <b>5 How concerned are you about your blood pressure?</b>                                   | 227                     | 175               | 134                 | 220                | 170                     | 124                     |
| Mean (SD)                                                                                   | 2.8 (2.4)               | 4.2 (2.9)         | 4.5 (3.0)           | 2.7 (2.4)          | 3.8 (2.7)               | 4.3 (2.9)               |
| <b>6 How much do you think your treatment can help manage your blood pressure?</b>          | 227                     | 174               | 134                 | 220                | 169                     | 121                     |
| Mean (SD)                                                                                   | 8.2 (2.0)               | 8.3 (1.8)         | 7.7 (2.4)           | 8.1 (2.3)          | 7.9 (2.3)               | 7.8 (2.5)               |
| <b>Combined Score<sup>a</sup></b>                                                           |                         |                   |                     |                    |                         |                         |
| Mean (SD)                                                                                   | 43.5 (7.8)              | 46.8 (6.7)        | 46.8 (6.2)          | 43.0 (7.6)         | 42.6 (8.8) <sup>b</sup> | 43.6 (7.9) <sup>c</sup> |

<sup>a</sup> Combined score is sum of individual component with q5 (concern) reversed. Maximum 60, higher reflects greater confidence in ability to manage hypertension

<sup>b</sup> and <sup>c</sup>  $p < 0.001$  for mean differences: Linear mixed effects model of adapted brief illness perception questionnaire score at 30 weeks and postnatal follow-up modelled against randomised arm, time point, an interaction between randomised arm and time point, parity, and baseline adapted brief illness perception questionnaire as fixed effects; site as a random effect, and a random intercept for each participant.



**eTable 6b.** Adapted Brief Illness Perception Questionnaire – Gestational Hypertension

| GH                                                                                          | Self-Monitoring (N=233) |                   |                     | Usual Care (N=221) |                          |                         |
|---------------------------------------------------------------------------------------------|-------------------------|-------------------|---------------------|--------------------|--------------------------|-------------------------|
|                                                                                             | Baseline                | 30 week follow-up | Postnatal follow-up | Baseline           | 30 week follow-up        | Postnatal follow-up     |
| <b>1 How confident are you that you can use a blood pressure monitor correctly? (N)</b>     | 196                     | 125               | 115                 | 199                | 128                      | 109                     |
| Mean (SD)                                                                                   | 8.6 (2.0)               | 9.3 (1.3)         | 9.5 (1.0)           | 8.7 (2.1)          | 8.0 (3.0)                | 8.1 (2.9)               |
| <b>2 How confident are you that you can accurately measure your blood pressure at home?</b> | 196                     | 124               | 115                 | 199                | 128                      | 109                     |
| Mean (SD)                                                                                   | 8.7 (2.0)               | 9.2 (1.3)         | 9.5 (1.1)           | 8.8 (2.0)          | 8.0 (3.0)                | 8.0 (3.0)               |
| <b>3 How well do you feel you understand your blood pressure?</b>                           | 195                     | 124               | 114                 | 199                | 127                      | 109                     |
| Mean (SD)                                                                                   | 7.5 (2.6)               | 8.5 (1.8)         | 8.6 (1.6)           | 7.9 (2.3)          | 7.5 (2.7)                | 7.6 (2.3)               |
| <b>4 How much control do you feel you have over your blood pressure?</b>                    | 195                     | 125               | 115                 | 199                | 127                      | 108                     |
| Mean (SD)                                                                                   | 5.5 (2.6)               | 6.0 (2.5)         | 6.1 (2.2)           | 5.6 (2.5)          | 5.6 (2.3)                | 5.6 (2.4)               |
| <b>5 How concerned are you about your blood pressure?</b>                                   | 196                     | 125               | 115                 | 199                | 127                      | 108                     |
| Mean (SD)                                                                                   | 4.2 (3.1)               | 4.7 (3.1)         | 5.9 (3.5)           | 4.2 (3.0)          | 4.9 (2.9)                | 5.6 (3.2)               |
| <b>6 How much do you think your treatment can help manage your blood pressure?</b>          | 196                     | 124               | 108                 | 199                | 126                      | 110                     |
| Mean (SD)                                                                                   | 7.1 (2.7)               | 6.7 (3.1)         | 7.1 (2.9)           | 6.9 (2.9)          | 6.5 (3.0)                | 7.0 (3.1)               |
| <b>Combined Score<sup>a*</sup></b>                                                          |                         |                   |                     |                    |                          |                         |
| Mean (SD)                                                                                   | 41.7 (8.5)              | 44.3 (7.7)        | 46.6 (6.2)          | 42.0 (8.2)         | 40.6 (10.4) <sup>b</sup> | 42.0(10.5) <sup>c</sup> |

<sup>a</sup>Combined score is sum of individual component with q5 (concern) reversed. Maximum 60, higher reflects greater confidence in ability to manage hypertension

<sup>b</sup> and <sup>c</sup> p<0.001 for mean differences: Linear mixed effects model of adapted brief illness perception questionnaire score at 30 weeks and postnatal follow-up modelled against randomised arm, time point, an interaction between randomised arm and time point, parity, and baseline adapted brief illness perception questionnaire as fixed effects; site as a random effect, and a random intercept for each participant.

**eTable 7a.** Summary of Maternal Health-Related Quality of Life Measured Using EQ-5D-5L Instrument in the Chronic Hypertension Cohort

|                                         | Self-monitoring (n=233) |               | Usual care (n=221) |               | Mean difference (95% CI) <sup>a</sup> |
|-----------------------------------------|-------------------------|---------------|--------------------|---------------|---------------------------------------|
|                                         | n                       | Mean (SD)     | n                  | Mean (SD)     |                                       |
| <i>Complete cases</i>                   |                         |               |                    |               |                                       |
| At enrolment                            | 230                     | 0.840 (0.167) | 216                | 0.851 (0.174) |                                       |
| At 30 weeks                             | 177                     | 0.761 (0.207) | 170                | 0.801 (0.159) | -0.021 (-0.055 to 0.013)              |
| At postnatal follow-up                  | 129                     | 0.848 (0.199) | 118                | 0.857 (0.147) | -0.002 (-0.040 to 0.035)              |
|                                         |                         |               |                    |               |                                       |
|                                         | n                       | Mean (SE)     | n                  | Mean (SE)     | Mean difference (95% CI) <sup>a</sup> |
| <i>Multiple imputation<sup>b</sup></i>  |                         |               |                    |               |                                       |
| At enrolment                            | 233                     | 0.839 (0.011) | 221                | 0.850 (0.012) |                                       |
| At 30 weeks                             | 233                     | 0.759 (0.015) | 221                | 0.792 (0.012) | -0.026 (-0.059 to 0.008)              |
| At postnatal follow-up                  | 233                     | 0.837 (0.016) | 221                | 0.857 (0.012) | -0.016 (-0.053 to 0.021)              |
|                                         |                         |               |                    |               |                                       |
|                                         | n                       | Mean (SD)     | n                  | Mean (SD)     | Mean difference (95% CI) <sup>a</sup> |
| <i>Sensitivity Analysis<sup>b</sup></i> |                         |               |                    |               |                                       |
| <i>Complete cases</i>                   |                         |               |                    |               |                                       |
| EQ-5D-5L baseline                       | 230                     | 0.840 (0.167) | 216                | 0.851 (0.174) |                                       |
| EQ-5D-5L baseline to 3 months           | 115                     | 0.788 (0.173) | 109                | 0.813 (0.148) | -0.015 (-0.053 to 0.023)              |
| EQ-5D-5L 3 months to 6 months           | 101                     | 0.783 (0.234) | 97                 | 0.806 (0.171) | -0.012 (-0.064 to 0.039)              |
| EQ-5D-5L 6 months to 12 months          | 76                      | 0.830 (0.208) | 64                 | 0.860 (0.148) | -0.019 (-0.068 to 0.031)              |
|                                         |                         |               |                    |               |                                       |
|                                         | n                       | Mean (SE)     | n                  | Mean (SE)     | Mean difference (95% CI) <sup>a</sup> |
| <i>Multiple imputation<sup>b</sup></i>  |                         |               |                    |               |                                       |
| EQ-5D-5L baseline                       | 233                     | 0.839 (0.011) | 221                | 0.851 (0.012) |                                       |
| EQ-5D-5L baseline to 3 months           | 233                     | 0.784 (0.015) | 221                | 0.800 (0.015) | -0.009 (-0.049 to 0.031)              |
| EQ-5D-5L 3 months to 6 months           | 233                     | 0.784 (0.020) | 221                | 0.798 (0.017) | -0.010 (-0.058 to 0.038)              |
| EQ-5D-5L 6 months to 12 months          | 233                     | 0.815 (0.021) | 221                | 0.864 (0.016) | -0.040 (-0.090 to 0.011)              |

EQ-5D-5L: EuroQol five-level health-related quality of life instrument; SD: standard deviation; SE: standard error <sup>a</sup>

<sup>a</sup>Adjusted for centre, parity and potential EQ-5D-5L index baseline imbalances

<sup>b</sup> See Appendix Text S1 for details of multiple imputation and sensitivity analyses

**eTable 7b.** Summary of Maternal Health-Related Quality of Life Measured Using EQ-5D-5L Instrument in the Gestational Hypertension Cohort

|                                         | Self-monitoring (n=197) |               | Usual care (n=199) |               | Mean difference (95% CI) <sup>a</sup> |
|-----------------------------------------|-------------------------|---------------|--------------------|---------------|---------------------------------------|
|                                         | n                       | Mean (SD)     | n                  | Mean (SD)     |                                       |
| <i>Complete cases</i>                   |                         |               |                    |               |                                       |
| At enrolment                            | 191                     | 0.788 (0.210) | 192                | 0.804 (0.161) |                                       |
| At 30 weeks                             | 50                      | 0.768 (0.185) | 62                 | 0.771 (0.168) | 0.024 (-0.039 to 0.086)               |
| At postnatal follow-up                  | 115                     | 0.827 (0.207) | 106                | 0.846 (0.180) | -0.014 (-0.062 to 0.033)              |
|                                         |                         |               |                    |               |                                       |
|                                         | n                       | Mean (SE)     | n                  | Mean (SE)     | Mean difference (95% CI) <sup>a</sup> |
| <i>Multiple imputation<sup>b</sup></i>  |                         |               |                    |               |                                       |
| At enrolment                            | 197                     | 0.786 (0.015) | 199                | 0.804 (0.012) |                                       |
| At 30 weeks                             | 197                     | 0.767 (0.024) | 199                | 0.738 (0.022) | 0.041 (-0.026 to 0.107)               |
| At postnatal follow-up                  | 197                     | 0.834 (0.016) | 199                | 0.841 (0.016) | 0.003 (-0.041 to 0.047)               |
|                                         |                         |               |                    |               |                                       |
|                                         | n                       | Mean (SD)     | n                  | Mean (SD)     | Mean difference (95% CI) <sup>a</sup> |
| <i>Sensitivity Analysis<sup>b</sup></i> |                         |               |                    |               |                                       |
| <i>Complete cases</i>                   |                         |               |                    |               |                                       |
| EQ-5D-5L baseline                       | 191                     | 0.788 (0.210) | 192                | 0.804 (0.161) |                                       |
| EQ-5D-5L baseline to 3 months           | 104                     | 0.814 (0.194) | 100                | 0.815 (0.186) | 0.004 (-0.046 to 0.053)               |
| EQ-5D-5L 3 months to 6 months           | 32                      | 0.815 (0.247) | 40                 | 0.821 (0.180) | 0.011 (-0.090 to 0.112)               |
| EQ-5D-5L 6 months to 12 months          | 11                      | 0.805 (0.122) | 8                  | 0.874 (0.113) | -0.076 (-0.258 to 0.107)              |
|                                         |                         |               |                    |               |                                       |
|                                         | n                       | Mean (SE)     | n                  | Mean (SE)     | Mean difference (95% CI) <sup>a</sup> |
| <i>Multiple imputation<sup>b</sup></i>  |                         |               |                    |               |                                       |
| EQ-5D-5L baseline                       | 197                     | 0.786 (0.015) | 199                | 0.803 (0.012) |                                       |
| EQ-5D-5L baseline to 3 months           | 197                     | 0.813 (0.018) | 199                | 0.819 (0.018) | 0.001 (-0.047 to 0.043)               |
| EQ-5D-5L 3 months to 6 months           | 197                     | 0.814 (0.034) | 199                | 0.813 (0.024) | 0.008 (-0.071 to 0.086)               |
| EQ-5D-5L 6 months to 12 months          | 197                     | 0.805 (0.037) | 199                | 0.874 (0.040) | -0.076 (-0.268 to 0.116)              |

EQ-5D-5L: EuroQol five-level health-related quality of life instrument; SD: standard deviation; SE: standard error<sup>a</sup>

<sup>a</sup>Adjusted for centre, parity, transition from BUMP1 and potential EQ-5D-5L index baseline imbalances

<sup>b</sup> See Appendix Text S1 for details of multiple imputation and sensitivity analyses

**eTable 8.** Adverse Events and Serious Adverse Events for Women With Chronic and Gestational Hypertension

|                                                                   | <b>Self-Monitoring</b> | <b>Usual Care</b> | <b>p value<sup>b</sup></b> |
|-------------------------------------------------------------------|------------------------|-------------------|----------------------------|
| <b>Chronic hypertension</b>                                       | <b>n=233</b>           | <b>n=221</b>      |                            |
| Number of participants experiencing an Adverse Event <sup>a</sup> | 3 (1.3)                | 0                 | 0.25                       |
| Number of participants experiencing a Serious Adverse Event       | 4 (1.7)                | 2 (0.9)           | 0.69                       |
| Relatedness to intervention (for Serious Adverse Events)          | 0                      | 0                 |                            |
|                                                                   |                        |                   |                            |
|                                                                   | <b>Self-Monitoring</b> | <b>Usual Care</b> |                            |
| <b>Gestational hypertension</b>                                   | <b>n=197</b>           | <b>n=199</b>      |                            |
| Number of participants experiencing an Adverse Event <sup>a</sup> | 2 (1.0)                | 0                 | 0.25                       |
| Number of participants experiencing a Serious Adverse Event       | 4 (2.0)                | 1 (0.5)           | 0.21                       |
| Relatedness to intervention (for Serious Adverse Events)          | 0                      | 0                 |                            |

<sup>a</sup> Clinically judged to be caused by the trial intervention

<sup>b</sup> From Fisher's exact test

**eTable 9.** Fidelity to Intervention: Proportion of Completed Home Blood Pressure Measurements (Out of the Number of Days With Expected Readings) for Self-monitoring Group Only

|                                                                                              | <b>Chronic hypertension</b> | <b>Gestational hypertension</b> | <b>Overall</b>       |
|----------------------------------------------------------------------------------------------|-----------------------------|---------------------------------|----------------------|
| <b>Proportion of days with completed home blood pressure readings (fidelity)</b>             | <b>n=233</b>                | <b>n=197</b>                    | <b>n=430</b>         |
| Number available                                                                             | n=211                       | n=154                           | n=365                |
| Median (IQR)                                                                                 | 59.6% (30.9 to 80.7)        | 57.1% (32.3 to 79.6)            | 58.8% (32.3 to 80.2) |
| <b>Transitioned from BUMP1</b>                                                               |                             | <b>n=131</b>                    | <b>n=131</b>         |
| Number available                                                                             | -                           | n=94                            | n=94                 |
| Median (IQR)                                                                                 | -                           | 50.9% (27.5 to 76.2)            | 50.9% (27.5 to 76.2) |
| <b>Recruited de novo into BUMP2</b>                                                          | <b>n=233</b>                | <b>n=66</b>                     | <b>n=299</b>         |
| Number available                                                                             | n=211                       | n=60                            | n=271                |
| Median (IQR)                                                                                 | 59.6% (30.9 to 80.7)        | 66.7% (41.7 to 80.9)            | 62.0% (37.9 to 80.7) |
|                                                                                              |                             |                                 |                      |
| <b>Time (days) between raised blood pressure on home and clinic measurements<sup>a</sup></b> | <b>n=233</b>                | <b>n=197</b>                    | <b>n=430</b>         |
| Number available                                                                             | n=161                       | n=98                            | n=259                |
| Median (IQR)                                                                                 | 14 (0 to 44)                | 1 (-1 to 6)                     | 5 (-1 to 28)         |
|                                                                                              |                             |                                 |                      |
| <b>1<sup>st</sup> trimester (0+0 to 12+6 weeks)</b>                                          |                             |                                 |                      |
| Number available                                                                             | n=17                        | n=0                             | n=17                 |
| Median (IQR)                                                                                 | 6 (1 to 58)                 | -                               | 6 (1 to 58)          |
|                                                                                              |                             |                                 |                      |
| <b>2<sup>nd</sup> trimester (13+0 to 25+6 weeks)</b>                                         |                             |                                 |                      |
| Number available                                                                             | n=118                       | n=11                            | n=129                |
| Median (IQR)                                                                                 | 15 (-2 to 47)               | 13 (0 to 62)                    | 15 (-1 to 47)        |
|                                                                                              |                             |                                 |                      |
| <b>3<sup>rd</sup> trimester (26+0 weeks to end of pregnancy)</b>                             |                             |                                 |                      |
| Number available                                                                             | n=26                        | n=87                            | n=113                |
| Median (IQR)                                                                                 | 16 (6 to 30)                | 1 (-1 to 5)                     | 2 (-1 to 9)          |

<sup>a</sup> Positive indicates raised blood pressure at home happened after clinic. Negative indicates raised blood pressure at home happened before clinic.

**eTable 10.** Defined Daily Dose (DDD) Proportions for Antihypertensive Medications Prescribed to Women Between Trial Entry and End of Pregnancy

|                                 | <b>Self-monitoring</b> | <b>Change in mean DDD proportion (95% CI)</b> | <b>Usual Care</b> | <b>Change in mean DDD proportion (95% CI)</b> |
|---------------------------------|------------------------|-----------------------------------------------|-------------------|-----------------------------------------------|
| <b>Chronic Hypertension</b>     |                        |                                               |                   |                                               |
| <i>20-weeks</i>                 | <b>n=109*</b>          |                                               | <b>n=102*</b>     |                                               |
| Mean (SD) DDD proportion        | 0.921 (0.606)          |                                               | 0.894 (0.588)     |                                               |
| <i>30-weeks</i>                 | <b>n=151*</b>          | <b>Between 20-30 weeks</b>                    | <b>n=132*</b>     | <b>Between 20-30 weeks</b>                    |
| Mean (SD) DDD proportion        | 1.082 (0.660)          | 0.161<br>(0.003 to 0.319)†                    | 1.001 (0.684)     | 0.107<br>(-0.060 to 0.274)                    |
| <i>End of pregnancy</i>         | <b>n=183*</b>          | <b>Between 30 weeks and end of pregnancy</b>  | <b>n=172*</b>     | <b>Between 30 weeks and end of pregnancy</b>  |
| Mean (SD) DDD proportion        | 1.213 (0.709)          | 0.131<br>(-0.018 to 0.280)                    | 1.158 (0.676)     | 0.157<br>(0.002 to 0.312)†                    |
|                                 |                        |                                               |                   |                                               |
| <b>Gestational Hypertension</b> |                        |                                               |                   |                                               |
| <i>20-weeks</i>                 | <b>n=3*</b>            |                                               | <b>n=3*</b>       |                                               |
| Mean (SD) DDD proportion        | 0.556 (0.192)          |                                               | 0.611 (0.481)     |                                               |
| <i>30-weeks</i>                 | <b>n=27*</b>           | <b>Between 20-30 weeks</b>                    | <b>n=25*</b>      | <b>Between 20-30 weeks</b>                    |
| Mean (SD) DDD proportion        | 0.852 (0.399)          | 0.296<br>(-0.188 to 0.780)                    | 0.893 (0.528)     | 0.282<br>(-0.377 to 0.941)                    |
| <i>End of pregnancy</i>         | <b>n=129*</b>          | <b>Between 30 weeks to end of pregnancy</b>   | <b>n=117*</b>     | <b>Between 30 weeks to end of pregnancy</b>   |
| Mean (SD) DDD proportion        | 1.040 (0.616)          | 0.188<br>(-0.057 to 0.433)                    | 1.066 (0.533)     | 0.173<br>(-0.059 to 0.405)                    |

DDD: Defined Daily Dose; SD: standard deviation

\*Number of women in the trial at time point with an ongoing pregnancy and prescribed antihypertensive medication.

†p<0.05
