# Supplementary material
Source: PubMed Central journal article supplement (PMC9066282)
Supplement: jama-e224726-s005.pdf [file jama-e224726-s005.pdf]

## Data Sharing Statement

Chappell. Effect of Self-monitoring of Blood Pressure on Blood Pressure Control in Pregnant Individuals With Chronic or Gestational Hypertension. *JAMA*. Published May 03, 2022.  
doi:10.1001/jama.2022.4726

### Data

**Data available:** Yes

**Data types:** Deidentified participant data

**How to access data:** Requests for Data Sharing should be directed to [information.guardian@phc.ox.ac.uk](mailto:information.guardian@phc.ox.ac.uk).

**When available:** beginning date: 05-31-2023

### Supporting Documents

**Document types:** None

### Additional Information

**Who can access the data:** Data are available from the authors upon reasonable request

**Types of analyses:** Analyses with a written protocol including analysis plan and signed data sharing/access agreement.

**Mechanisms of data availability:** Use of data will require approval by an independent review committee identified for this purpose and investigators requesting data will need to provide a written protocol including analysis plan and sign a data sharing/access agreement.
